# Supplementary material for: CPSF3 Promotes Pre-mRNA Splicing and Prevents CircRNA Cyclization in Hepatocellular Carcinoma
Source: MDPI journal article supplement (doi:10.3390/cancers15164057), 2023-08-11

**Fig2. E**

CPSF3

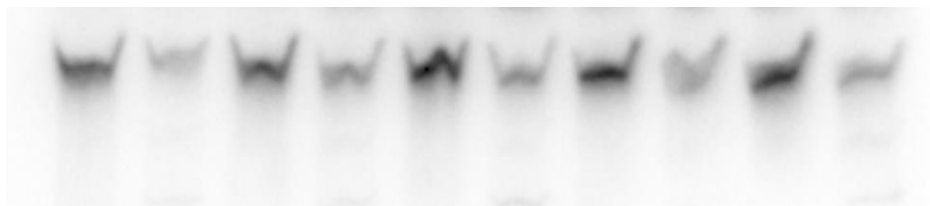

Actin

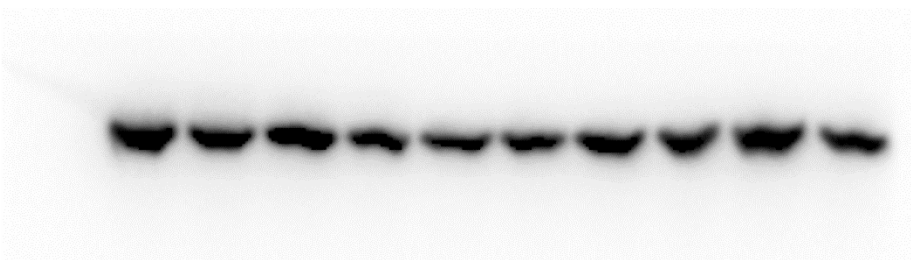

**Fig2. F**

CPSF3

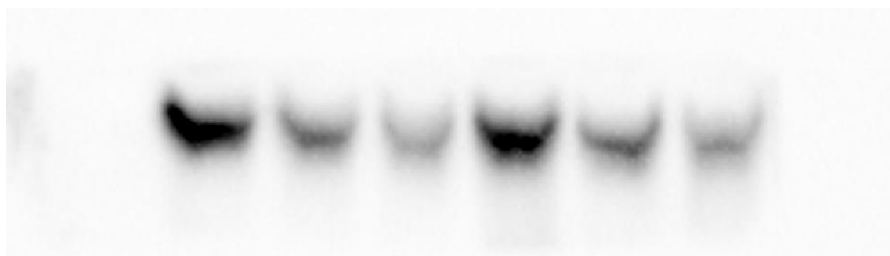

Actin

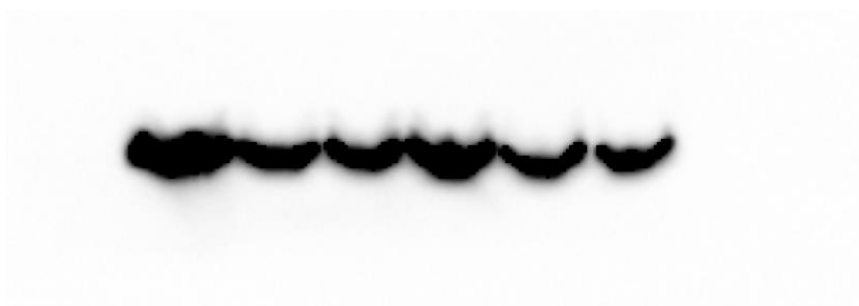

**Fig3. A**

CPSF3

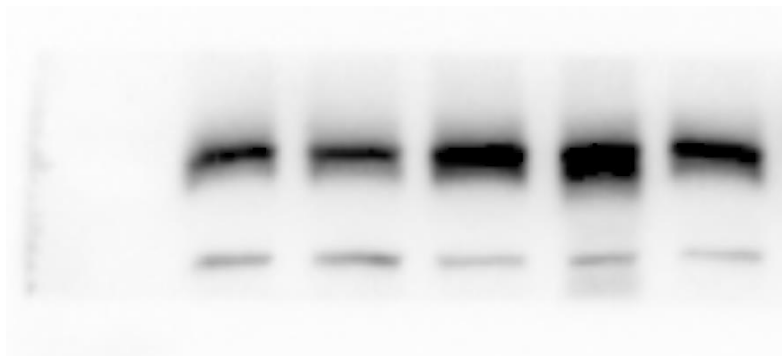

Actin

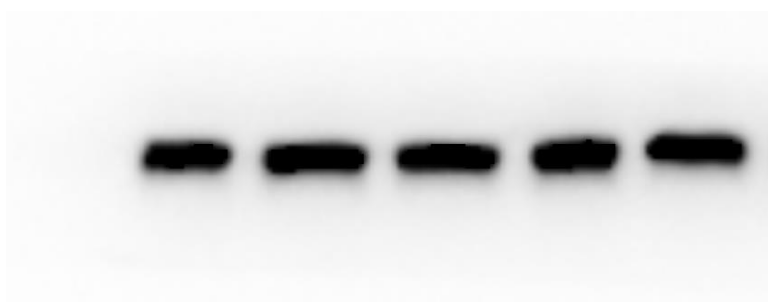

**Fig3. B**

CPSF3

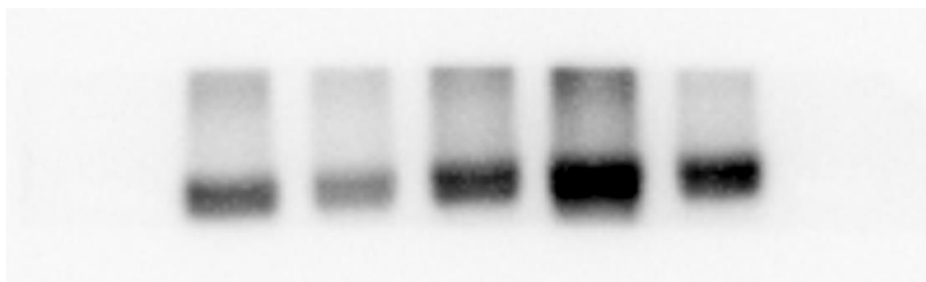

Actin

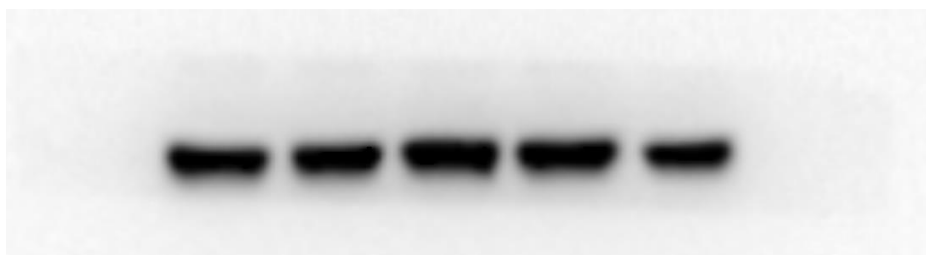

**Fig6. B**

hsa\_circ\_0001380

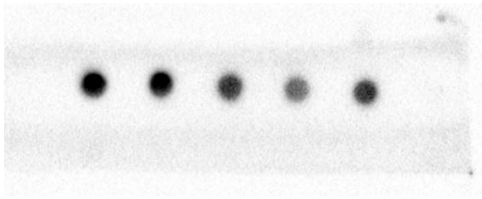

hsa\_circ\_0078607

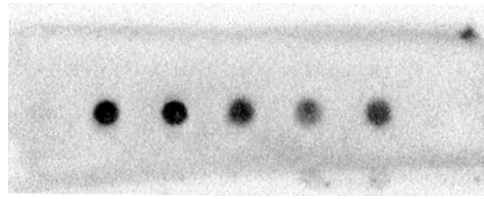

hsa\_circ\_0008305

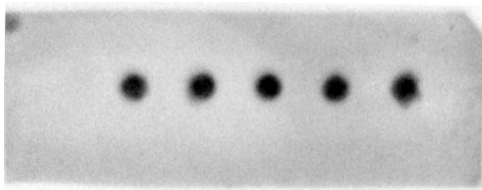

$\beta$ -actin

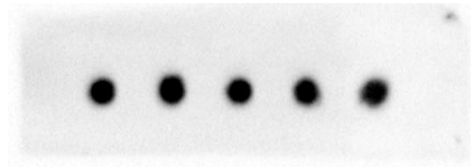

**Fig6. D**

UBXN7

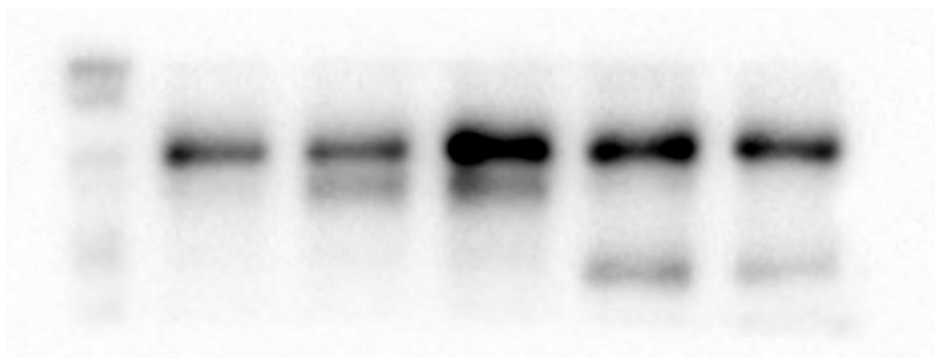

SLC22A3

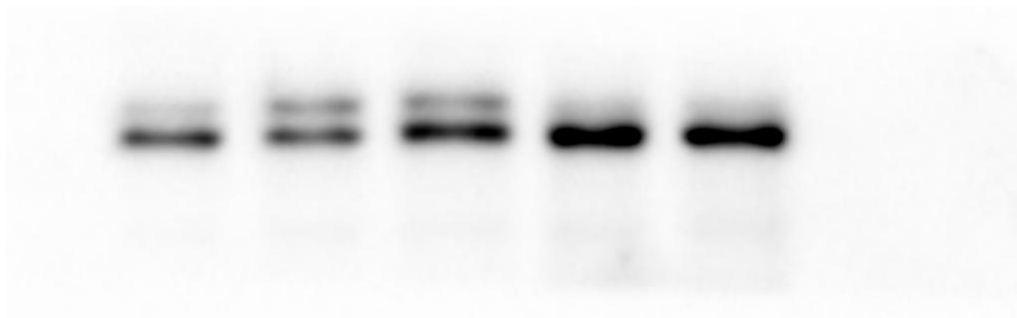

Actin

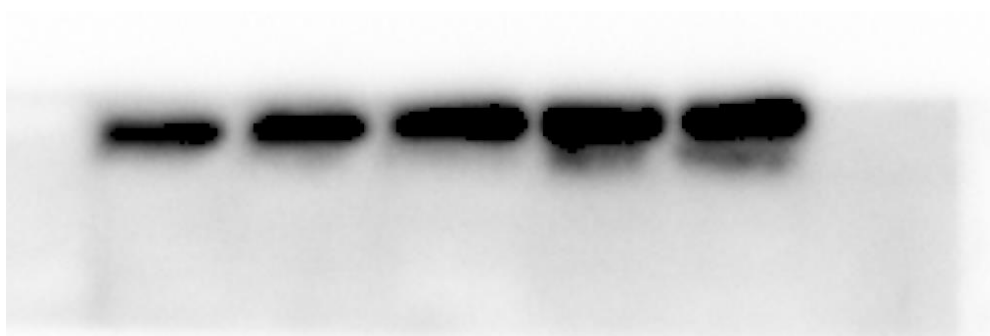

**Fig6. H**

E2F1

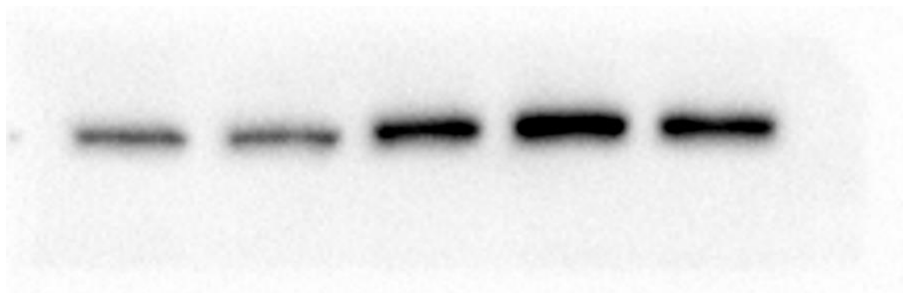

NCAPG2

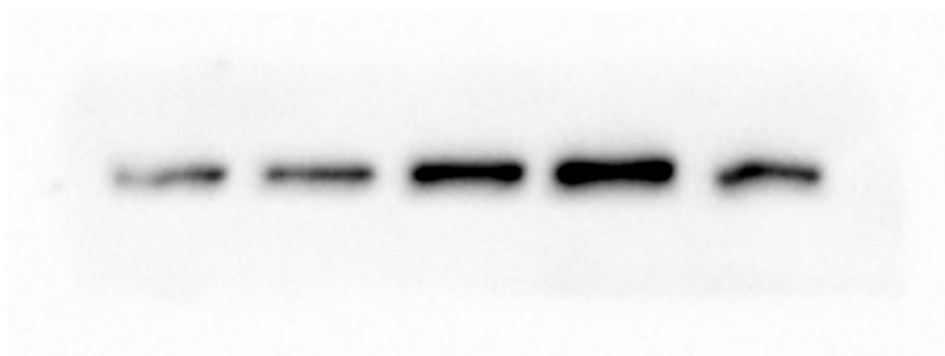

CPSF3

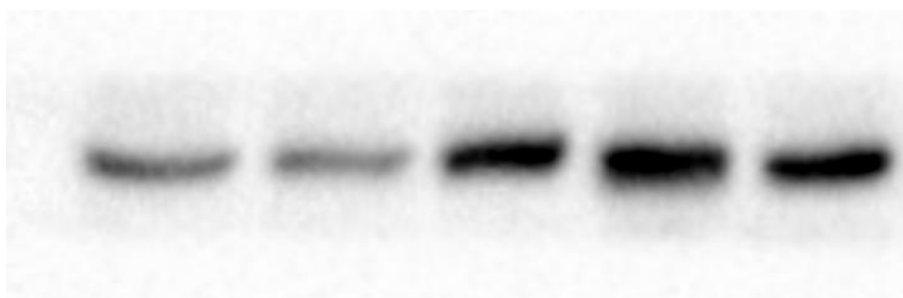

Actin

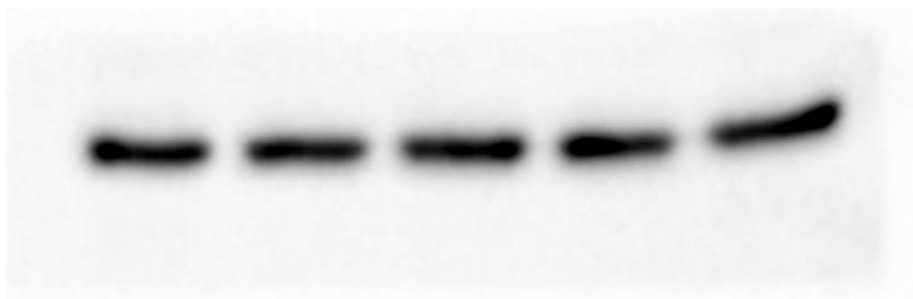

**Fig7. E-left**

E2F1

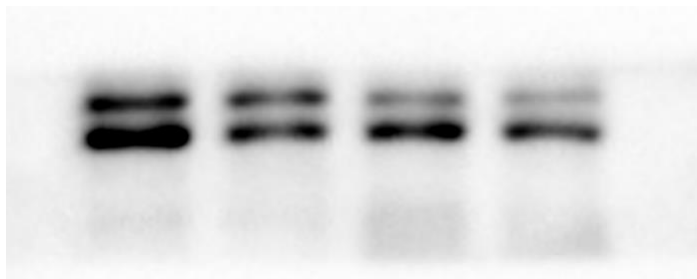

NCAPG2

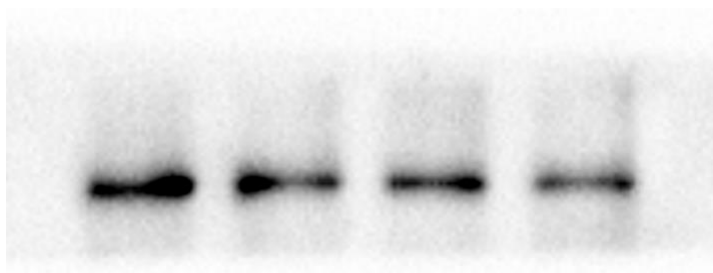

GAPDH

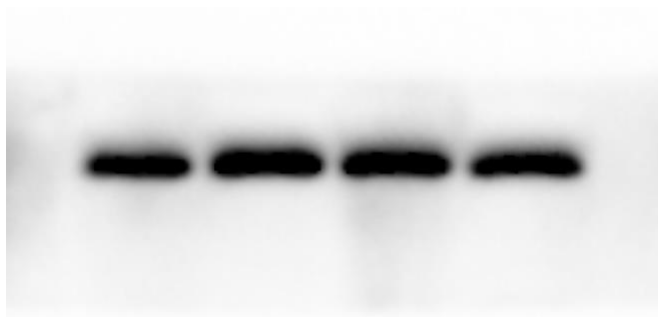

**Fig7. E-right**

E2F1

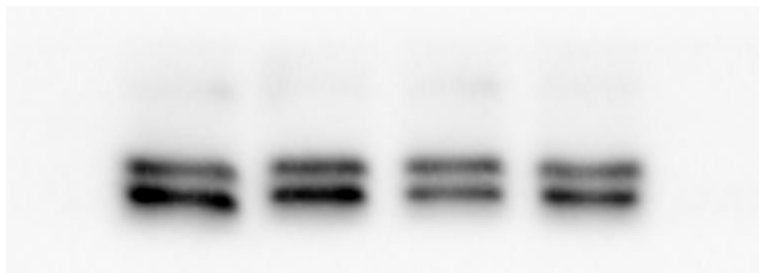

NCAPG2

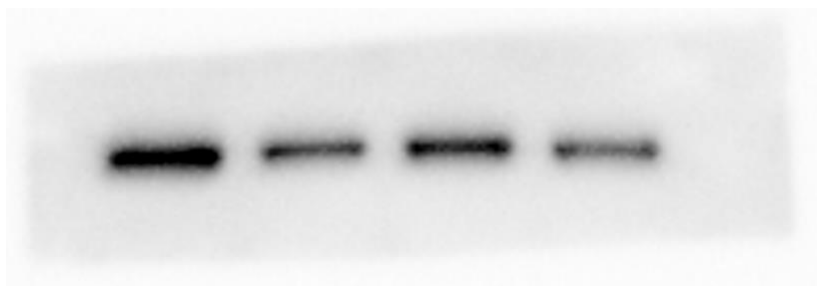

GAPDH

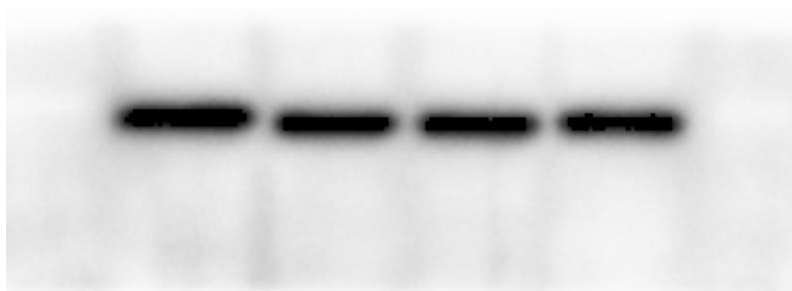

**Fig7. F-left**

UBXN7

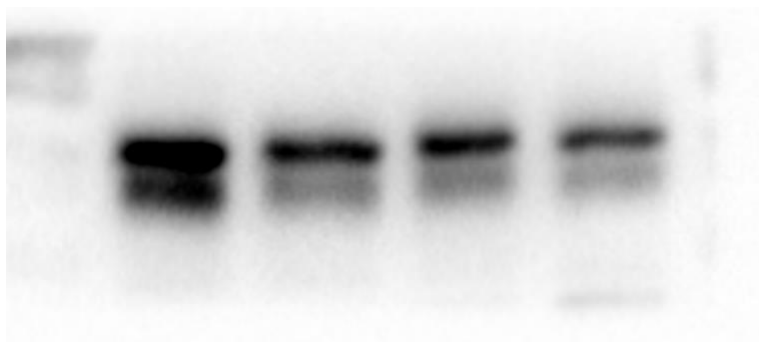

SCL22A3

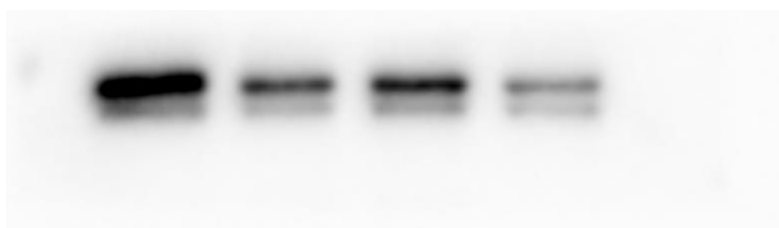

GAPDH

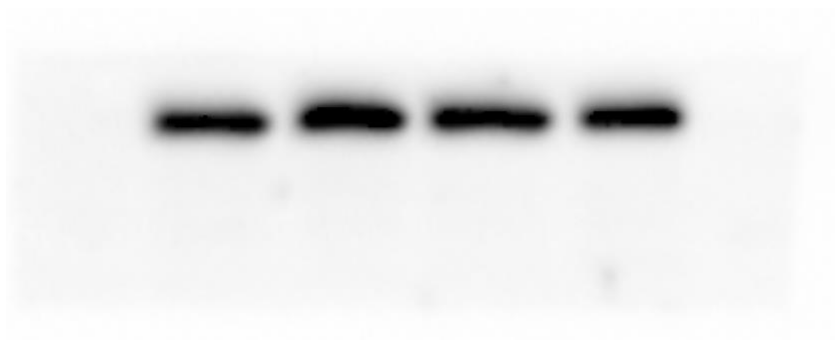

**Fig7. F-right**

UBXN7

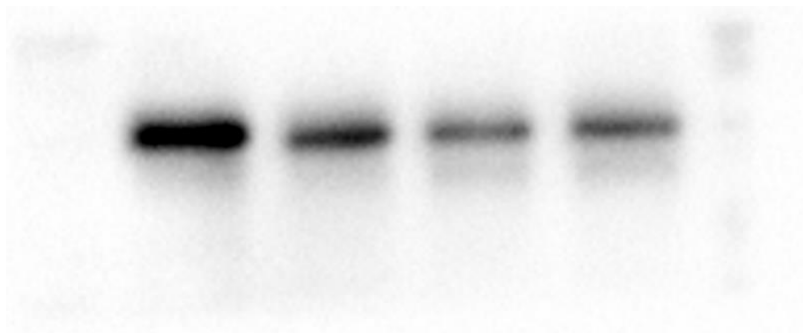

SLC22A3

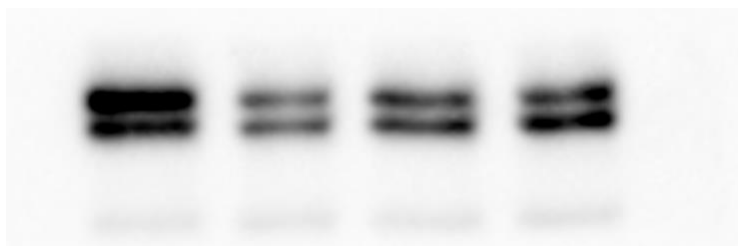

GAPDH

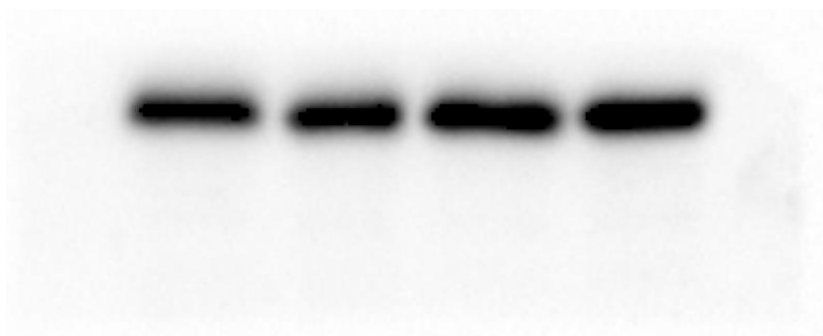

Supplement: s1 [file s1]
